# Supplementary material for: Alkali metal⋯methyl short contacts in aluminates: more than agostic interactions
Source: Royal Society of Chemistry journal article supplement (doi:10.1039/d2fd00144f), 2022-12-13
Supplement: d2fd00144f2.pdf [file d2fd00144f2.pdf]

## Supporting Information

# Alkali metal...methyl short contacts in aluminates: more than agostic interactions

Jesús Damián<sup>a</sup>, Christian Rentero<sup>a</sup>, Jorge Echeverría<sup>b\*</sup>, Marta E. G. Mosquera<sup>a\*</sup>

a) Department of Organic and Inorganic Chemistry, Institute of Chemical Research “Andrés M. del Río” (IQAR), Universidad de Alcalá, Campus Universitario, 28871 Alcalá de Henares, Madrid (Spain). e-mail: [martaeg.mosquera@uah.es](mailto:martaeg.mosquera@uah.es)

b) Departamento de Química Inorgánica, Instituto de Síntesis Química y Catálisis Homogénea (ISQCH), CSIC-Universidad de Zaragoza, Pedro Cerbuna 12, 50009 Zaragoza (Spain). e-mail: [jorge.echeverria@unizar.es](mailto:jorge.echeverria@unizar.es)

## 1. Spectroscopic data for 1

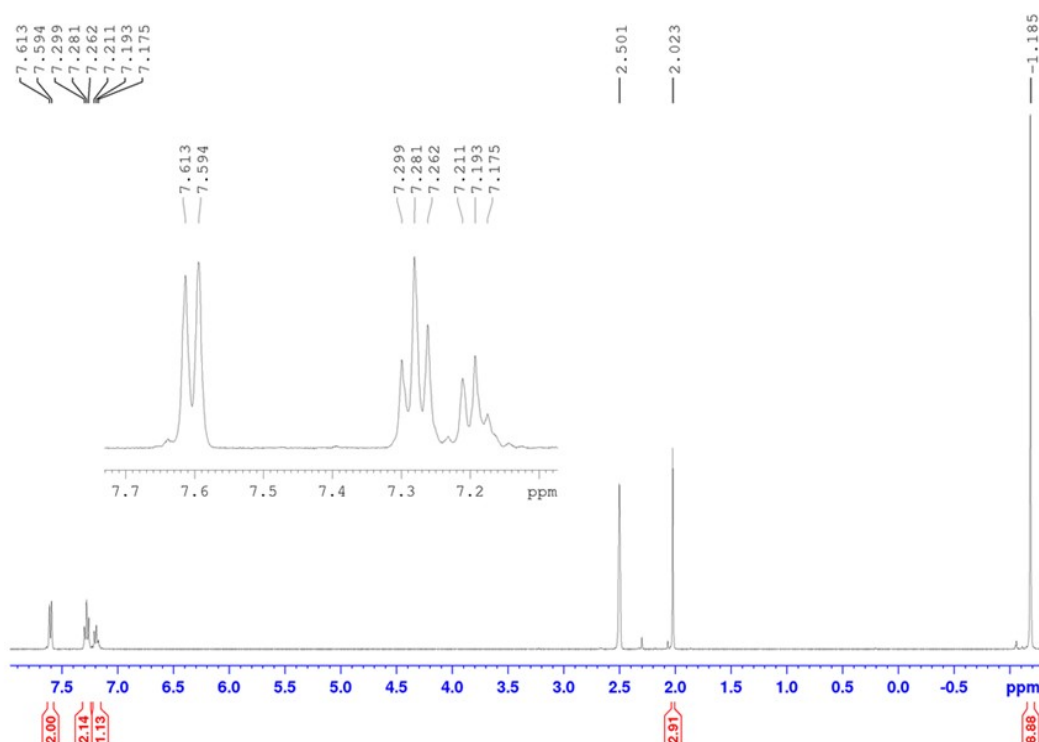

**Figure S1** <sup>1</sup>H (400 MHz, DMSO-d<sub>6</sub>) NMR spectrum of complex [NaAlMe<sub>3</sub>(Ox)] (1). δ -1.19 (s, 9H, AlCH<sub>3</sub>), 2.02 (s, 3H, C<sub>8</sub>H<sub>3</sub>), 7.19 (t, 1H, J=7.5Hz, C<sub>4</sub>H), 7.28 (t, 2H, J=7.5Hz, C<sub>3,5</sub>H), 7.60 (d, 2H, J=7.5Hz, C<sub>2,6</sub>H)

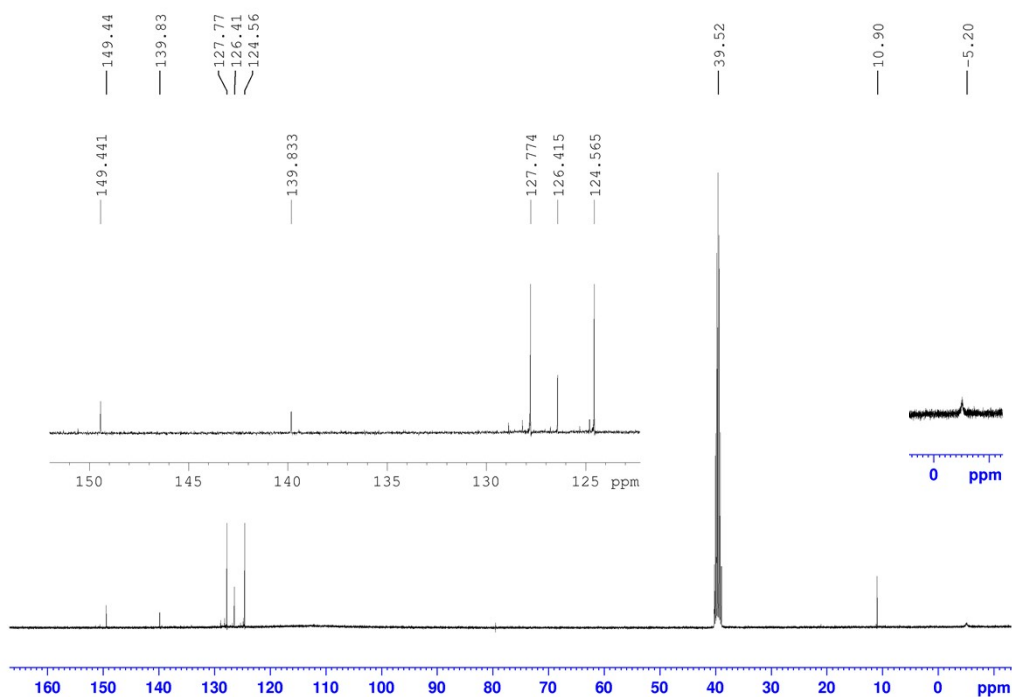

**Figure S2** <sup>13</sup>C (100.6 MHz, DMSO-d<sub>6</sub>) NMR spectrum of complex [NaAlMe<sub>3</sub>(Ox)] (1). δ -5.2 (AlCH<sub>3</sub>), 10.9 (C<sub>8</sub> H<sub>3</sub>), 124.6 (C<sub>2,6</sub>H), 126.4 (C<sub>4</sub>H), 127.8 (C<sub>3,5</sub>H), 139.8 (C<sub>1</sub>), 149.4 (C<sub>7</sub>)

## 2. Single-Crystal X-ray Data for 1.

**Table S1** Crystallographic data for [NaAlMe<sub>3</sub>(Ox)] (1)

|                                                          | [NaAlMe <sub>3</sub> (Ox)]             |
|----------------------------------------------------------|----------------------------------------|
| Empirical formula                                        | C <sub>11</sub> H <sub>17</sub> AlNaNO |
| Formula weight                                           | 229.22                                 |
| Color, shape                                             | Yellow/block                           |
| Crystal size (mm)                                        | 0.41 x 0.34 x 0.21                     |
| Crystal system                                           | Monoclinic                             |
| Space group                                              | <i>P2<sub>1</sub>/c</i>                |
| a (Å)                                                    | 9.5855(4)                              |
| b (Å)                                                    | 11.0763(5)                             |
| c (Å)                                                    | 13.1896(7)                             |
| α (°)                                                    | 90                                     |
| β (°)                                                    | 99.386(4)                              |
| γ (°)                                                    | 90                                     |
| V (Å <sup>3</sup> )                                      | 1381.62(11)                            |
| Z                                                        | 4                                      |
| ρ <sub>calcd.</sub> (mg m <sup>-3</sup> )                | 1.102                                  |
| F <sub>000</sub>                                         | 488                                    |
| μ (mm <sup>-1</sup> )                                    | 0.155                                  |
| θ Range (°)                                              | 3.061 to 27.502                        |
| Reflns. Collected                                        | 6142                                   |
| Indep. Reflns./R(int)                                    | 3171/0.0331                            |
| Data/restraints/param                                    | 3171 / 0 / 172                         |
| R <sub>1</sub> /wR <sub>2</sub> (I > 2σ(I)) <sup>a</sup> | 0.0420/0.1043                          |
| R <sub>1</sub> /wR <sub>2</sub> (all data) <sup>a</sup>  | 0.0754/0.1140                          |
| GOF                                                      | 1.031                                  |
| Max/min Δρ (e.Å <sup>-3</sup> )                          | 0.342 and -0.291                       |

<sup>a</sup>  $R_1 = \Sigma(|F_o| - |F_c|) / \Sigma|F_o|$ ;  $wR_2 = \{\Sigma[w(F_o^2 - F_c^2)^2] / \Sigma[w(F_o^2)^2]\}^{1/2}$ ;  $GOF = \{\Sigma[w(F_o^2 - F_c^2)^2] / (n - p)\}^{1/2}$

**Table S2** Bond lengths (Å) and angles (°) for [NaAlMe<sub>3</sub>(Ox)] (1)

| Bond lengths (Å) |            |             |            |
|------------------|------------|-------------|------------|
| Al(1)-O(1)       | 1.8299(13) | Na-C(3)     | 2.757(2)   |
| Al(1)-C(2)       | 1.978(2)   | Na-O(1)     | 2.7766(15) |
| Al(1)-C(1)       | 1.985(2)   | Na-C(2)#1   | 3.094(2)   |
| Al(1)-C(3)       | 1.989(2)   | Na-Na#1     | 3.7777(14) |
| Al(1)-Na#1       | 3.3743(9)  | N(1)-C(10)  | 1.282(2)   |
| Al(1)-Na         | 3.3753(9)  | N(1)-O(1)   | 1.4104(19) |
| Na-O(1)#1        | 2.2573(14) | C(4)-C(10)  | 1.499(3)   |
| Na-N(1)          | 2.3489(17) | C(10)-C(11) | 1.486(3)   |
| Na-C(1)#2        | 2.701(2)   |             |            |

  

| Angles (°)       |            |                  |            |
|------------------|------------|------------------|------------|
| O(1)-Al(1)-C(2)  | 101.30(8)  | O(1)#1-Na-Al(1)  | 95.56(4)   |
| O(1)-Al(1)-C(1)  | 106.88(9)  | N(1)-Na-Al(1)    | 53.61(4)   |
| C(2)-Al(1)-C(1)  | 113.73(10) | C(1)#2-Na-Al(1)  | 132.87(6)  |
| O(1)-Al(1)-C(3)  | 109.98(8)  | C(3)-Na-Al(1)    | 36.10(5)   |
| C(2)-Al(1)-C(3)  | 112.44(11) | O(1)-Na-Al(1)    | 32.81(3)   |
| C(1)-Al(1)-C(3)  | 111.81(10) | C(2)#1-Na-Al(1)  | 134.92(6)  |
| O(1)-Al(1)-Na#   | 138.69(4)  | Al(1)#1-Na-Al(1) | 111.93(2)  |
| C(2)-Al(1)-Na#   | 164.59(7)  | O(1)#1-Na-Na#1   | 46.88(4)   |
| C(1)-Al(1)-Na#1  | 131.91(8)  | N(1)-Na-Na#1     | 60.10(4)   |
| C(3)-Al(1)-Na#1  | 112.19(7)  | C(1)#2-Na-Na#1   | 171.14(6)  |
| O(1)-Al(1)-Na    | 55.30(5)   | C(3)-Na-Na#1     | 85.98(5)   |
| C(2)-Al(1)-Na    | 117.85(7)  | O(1)-Na-Na#1     | 36.40(3)   |
| C(1)-Al(1)-Na    | 127.67(7)  | C(2)#1-Na-Na#1   | 84.36(5)   |
| C(3)-Al(1)-Na    | 54.75(7)   | Al(1)#1-Na-Na#1  | 55.98(2)   |
| Na#1-Al(1)-Na    | 68.07(2)   | Al(1)-Na-Na#1    | 55.95(2)   |
| O(1)#1-Na-N(1)   | 103.04(6)  | C(10)-N(1)-O(1)  | 114.55(15) |
| O(1)#1-Na-C(1)#2 | 125.49(7)  | C(10)-N(1)-Na    | 142.21(12) |
| N(1)-Na-C(1)#2   | 124.13(7)  | O(1)-N(1)-Na     | 91.76(9)   |
| O(1)#1-Na-C(3)   | 109.03(6)  | N(1)-O(1)-Al(1)  | 114.80(10) |
| N(1)-Na-C(3)     | 84.19(6)   | N(1)-O(1)-Na#1   | 127.30(9)  |
| C(1)#2-Na-C(3)   | 101.93(7)  | Al(1)-O(1)-Na#1  | 110.87(6)  |
| O(1)#1-Na-O(1)   | 83.28(5)   | N(1)-O(1)-Na     | 57.73(8)   |
| N(1)-Na-O(1)     | 30.51(4)   | Al(1)-O(1)-Na    | 91.89(6)   |
| C(1)#2-Na-O(1)   | 150.73(7)  | Na#1-O(1)-Na     | 96.72(5)   |
| C(3)-Na-O(1)     | 68.87(5)   | Al(1)-C(1)-Na#3  | 167.86(12) |

|                   |           |                   |            |
|-------------------|-----------|-------------------|------------|
| O(1)#1-Na-C(2)#1  | 64.62(5)  | Al(1)-C(2)-Na#    | 180.14(7)  |
| N(1)-Na-C(2)#1    | 90.06(7)  | Al(1)-C(3)-Na     | 89.16(8)   |
| C(1)#2-Na-C(2)#1  | 87.79(7)  | N(1)-C(10)-C(11)  | 115.43(16) |
| C(3)-Na-C(2)#1    | 170.28(7) | N(1)-C(10)-C(4)   | 124.03(17) |
| O(1)-Na-C(2)#1    | 102.40(6) | C(11)-C(10)-C(4)  | 120.54(17) |
| O(1)#1-Na-Al(1)#1 | 30.45(3)  | C(16)-C(11)-C(12) | 117.87(18) |
| N(1)-Na-Al(1)#1   | 92.03(4)  | C(16)-C(11)-C(10) | 121.53(17) |
| C(1)#2-Na-Al(1)#1 | 115.19(6) | C(12)-C(11)-C(10) | 120.60(18) |
| C(3)-Na-Al(1)#1   | 136.86(6) | C(13)-C(12)-C(11) | 120.4(2)   |
| O(1)-Na-Al(1)#1   | 86.54(3)  | C(14)-C(13)-C(12) | 120.6(2)   |
| C(2)#1-Na-Al(1)#1 | 35.27(4)  | C(13)-C(14)-C(15) | 119.3(2)   |
| C(14)-C(15)-C(16) | 120.7(2)  | C(15)-C(16)-C(11) | 121.0(2)   |

---

Symmetry transformations used to generate equivalent atoms: #1  $-x, -y+2, -z$  #2  $x, -y+3/2, z-1/2$   
#3  $x, -y+3/2, z+1/2$
